# Supplementary material for: Genomic and Genetic Diversity within the Pseudomonas fluorescens Complex
Source: PubMed Central journal article supplement (PMC4767706; doi:10.1371/journal.pone.0150183), 2016-02-25
Supplement: pone.0150183.s001.pdf [file pone.0150183.s001.pdf]

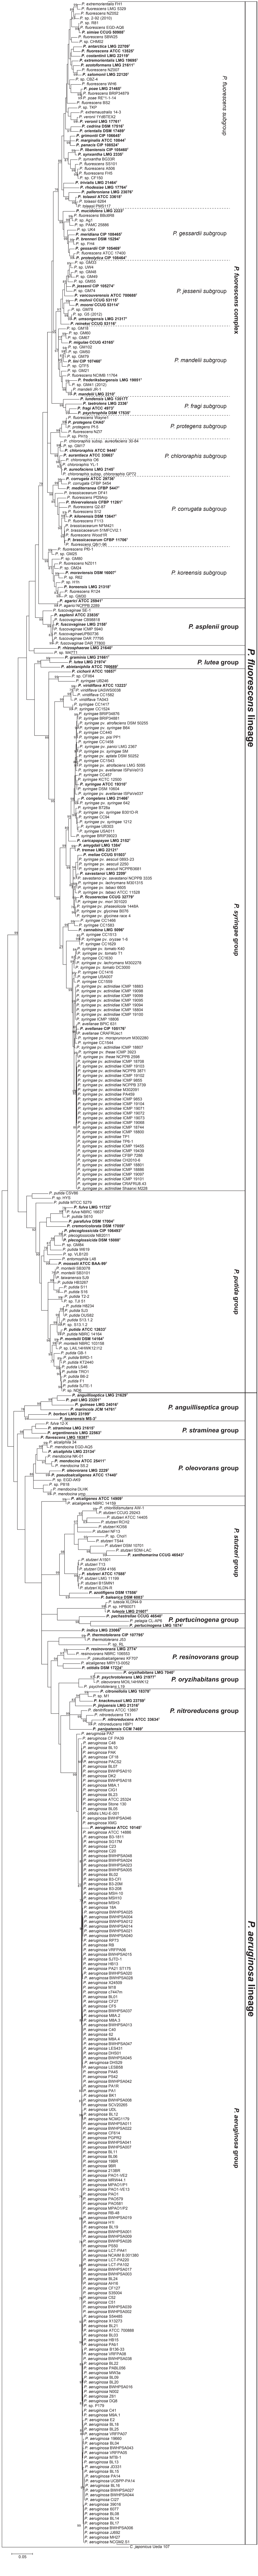

*P. fluorescens* subgroup

*P. gessardii* subgroup

*P. fluorescens* complex

*P. jessenii* subgroup

*P. mandelii* subgroup

*P. fragi* subgroup

*P. protegens* subgroup

*P. chlororaphis* subgroup

*P. corrugata* subgroup

*P. koreensis* subgroup

*P. asplenii* group

*P. lutea* group

*P. fluorescens* lineage

*P. syringae* group

*P. putida* group

*P. anguilliseptica* group

*P. straminea* group

*P. oleovorans* group

*P. stutzeri* group

*P. pertucinogena* group

*P. resinovorans* group

*P. oryzae* group

*P. nitroreducens* group

*P. aeruginosa* lineage

*P. aeruginosa* group
