# Supplementary material for: Genomic and Genetic Diversity within the Pseudomonas fluorescens Complex
Source: PubMed Central journal article supplement (PMC4767706; doi:10.1371/journal.pone.0150183), 2016-02-25
Supplement: pone.0150183.s002.pdf [file pone.0150183.s002.pdf]

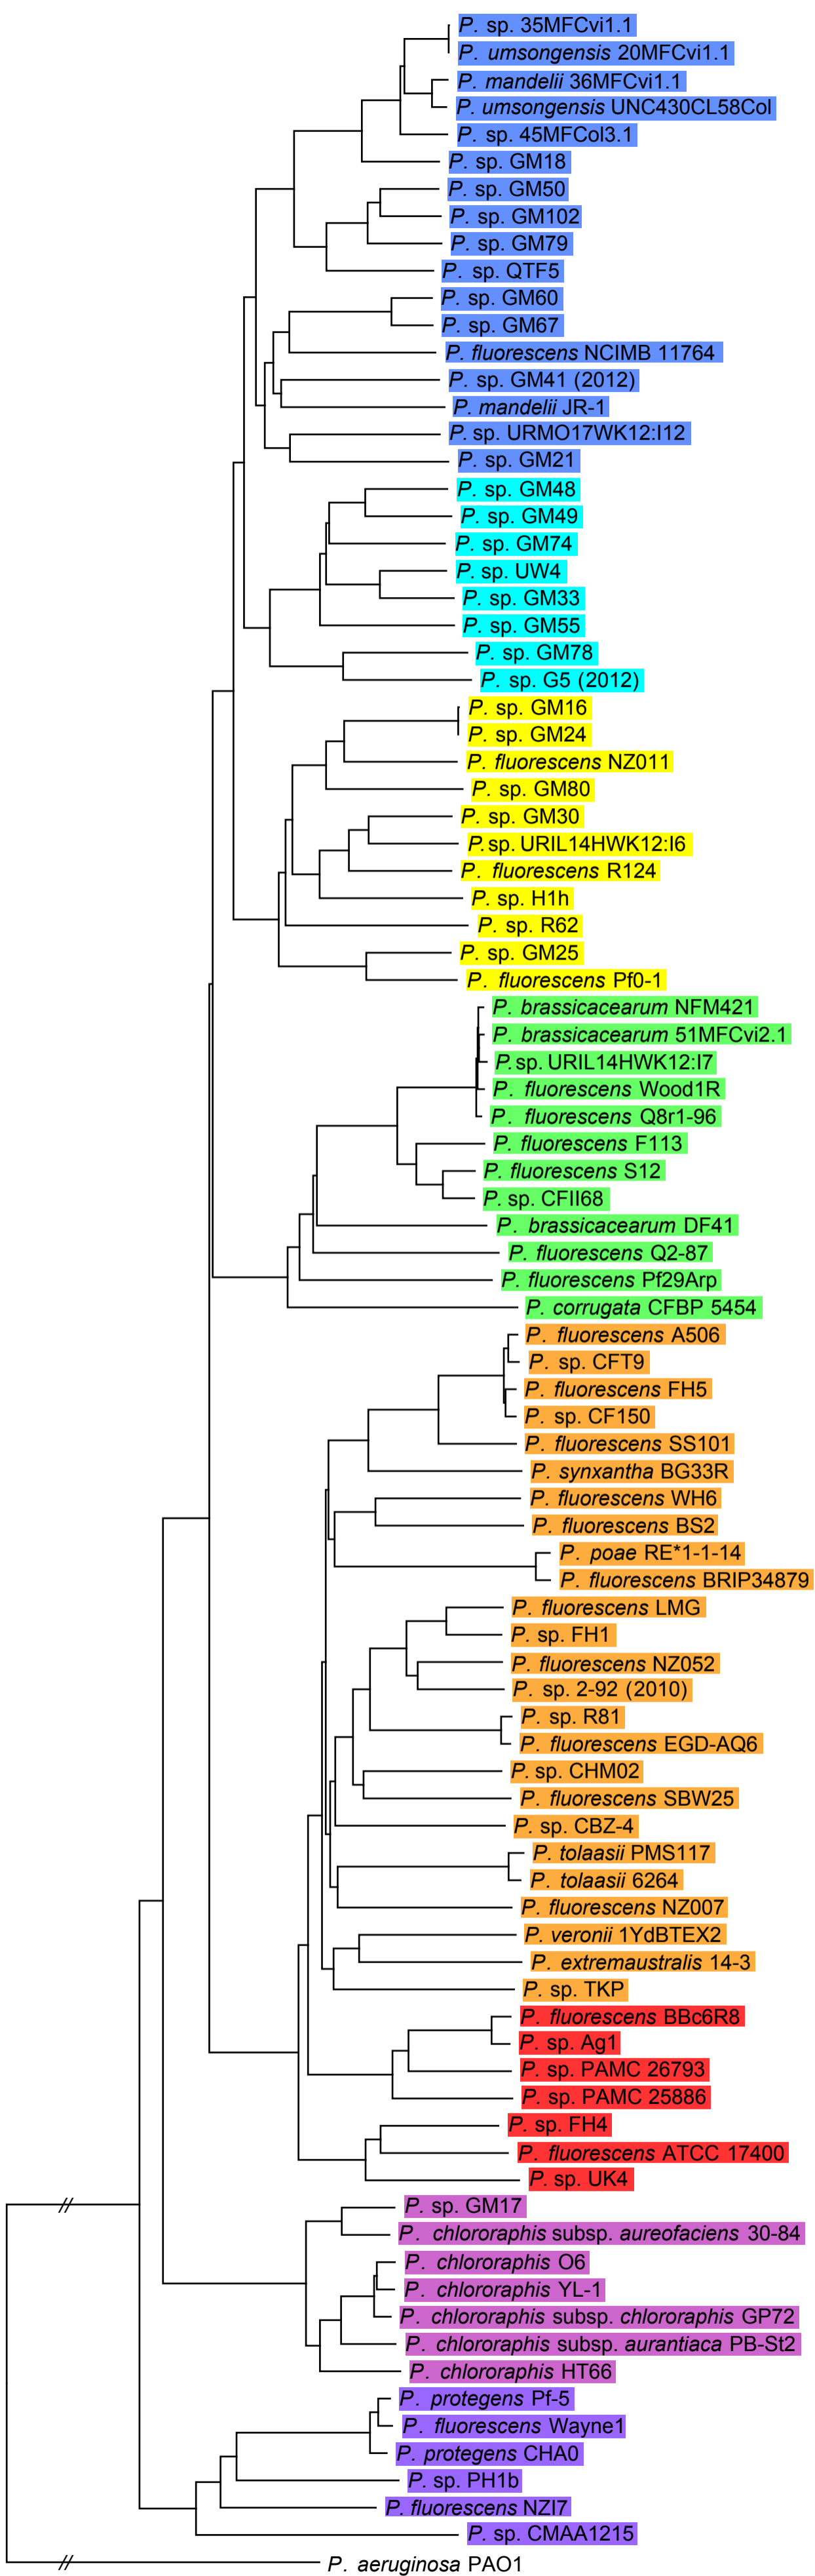

0.05
